# Supplementary material for: Using the Theory of Protected Needs to conceptualize sustainability as ‘caring for human wellbeing': an empirical confirmation of the theory's potential
Source: Frontiers journal article supplement (doi:10.3389/frsus.2023.1036666), 2023-11-10
Supplement: Data_Sheet_1.zip [file Data_Sheet_1.zip]

## **Using the Theory of Protected Needs to conceptualize sustainability as 'caring for human well-being': An empirical confirmation of the theory's potential**

*Antonietta Di Giulio, Rico Defila, Corinne Ruesch Schweizer*

Front. Sustain. Sec. Sustainable Consumption Volume 4 - 2023 | doi: 10.3389/frsus.2023.1036666

# **Appendix A: Geschützte Bedürfnisse, Besoins Protégés**

*Antonietta Di Giulio & Rico Defila*

(Protected Needs, German and French version)

*cite as:*

Di Giulio, Antonietta; Defila, Rico (2023): Geschützte Bedürfnisse, Besoins Protégés. Appendix A to: Using the Theory of Protected Needs to conceptualize sustainability as 'caring for human well-being': An empirical confirmation of the theory's potential. Front. Sustain. Sec. Sustainable Consumption Volume 4 - 2023.

**Geschützte Bedürfnisse (German version)** (October 15th 2016)

| <b>Gruppe 1, Fokus auf Materielles (Geschützte Bedürfnisse 1-3)</b>  |                                                                                                                                                                                                                                                                                                                                                                                                                                                                                                                                         |
|----------------------------------------------------------------------|-----------------------------------------------------------------------------------------------------------------------------------------------------------------------------------------------------------------------------------------------------------------------------------------------------------------------------------------------------------------------------------------------------------------------------------------------------------------------------------------------------------------------------------------|
| <i>Bedürfnis (was Menschen sollen wollen können)</i>                 | <i>Beschreibung: Menschen sollen die Möglichkeit haben ...</i>                                                                                                                                                                                                                                                                                                                                                                                                                                                                          |
| (1) Mit Gütern für den Lebensbedarf versorgt sein                    | <p>... sich mit Nahrungsmitteln, die der Gesundheit nicht schaden, ausreichend und vielfältig zu ernähren.</p> <p>... ihre individuelle Vorstellung von Wohnen zu realisieren in einer angemessen geschützten und ausgestatteten Unterkunft, die Privatsphäre und ausreichend Platz bietet.</p> <p>... ihren Körper in Würde zu pflegen und sich angemessen zu kleiden.</p>                                                                                                                                                             |
| (2) Die eigene Vorstellung des täglichen Lebens realisieren          | <p>... ihren Alltag nach eigenen Vorstellungen zu gestalten.</p> <p>... die Güter des Lebensbedarfs nach ihren eigenen Prioritäten aus einem vielfältigen Angebot zu beschaffen und zu verwenden und dafür ausreichende Mittel zur Verfügung zu haben.</p> <p>... sich im öffentlichen Raum ungehindert zu bewegen.</p>                                                                                                                                                                                                                 |
| (3) In einer lebenswerten Umgebung leben                             | <p>... in einer Umwelt (gebaut und natürlich) zu leben, die der Gesundheit nicht schadet und ästhetisch ansprechend ist.</p> <p>... einen sinnlichen und emotionalen Bezug zur Natur aufzubauen.</p> <p>... Zugang zu vielfältigen Natur- und Kulturlandschaften zu haben und sich in diesen zu bewegen.</p>                                                                                                                                                                                                                            |
| <b>Gruppe 2, Fokus auf Person (Geschützte Bedürfnisse 4-6)</b>       |                                                                                                                                                                                                                                                                                                                                                                                                                                                                                                                                         |
| <i>Bedürfnis (was Menschen sollen wollen können)</i>                 | <i>Beschreibung: Menschen sollen die Möglichkeit haben ...</i>                                                                                                                                                                                                                                                                                                                                                                                                                                                                          |
| (4) Sich als Person entwickeln                                       | <p>... ihr Potential (Kenntnisse, Fähigkeiten, Einstellungen, Gefühle etc.) und damit ihre individuelle Identität zu entwickeln.</p> <p>... sich Herausforderungen ihrer Wahl zu stellen.</p> <p>... sich frei zuverlässige Informationen zu beschaffen und sich daraus ein eigenes Urteil zu bilden.</p>                                                                                                                                                                                                                               |
| (5) Über sich selbst bestimmen                                       | <p>... frei zu entscheiden, welche Wertorientierung sie annehmen oder ablehnen (Spiritualität, Religiosität, Weltanschauung etc.), und ihre Wertorientierung umzusetzen.</p> <p>... sich ihre eigenen Lebensziele zu setzen und diese zu verfolgen.</p> <p>... ihre Lebensführung selbst zu bestimmen (intime Beziehungen, Familienplanung, Wohnort etc.).</p>                                                                                                                                                                          |
| (6) Für sie selbst wertvolle Tätigkeiten ausüben                     | <p>... Tätigkeiten auszuüben, die sie selbst als erfüllend erachten (in Arbeit und Freizeit; bezahlte und unbezahlte).</p> <p>... Tätigkeiten auszuüben, die ihrer Persönlichkeit entsprechen und in denen sie ihr Potential entfalten können (in Arbeit und Freizeit; bezahlte und unbezahlte).</p> <p>... ihre Zeit für ihre verschiedenen Tätigkeiten nach ihren Vorstellungen einzuteilen und dabei auch Zeit zu haben, um nichts zu tun.</p>                                                                                       |
| <b>Gruppe 3, Fokus auf Gemeinschaft (Geschützte Bedürfnisse 7-9)</b> |                                                                                                                                                                                                                                                                                                                                                                                                                                                                                                                                         |
| <i>Bedürfnis (was Menschen sollen wollen können)</i>                 | <i>Beschreibung: Menschen sollen die Möglichkeit haben ...</i>                                                                                                                                                                                                                                                                                                                                                                                                                                                                          |
| (7) Teil einer Gemeinschaft sein                                     | <p>... soziale Beziehungen zu anderen Menschen zu pflegen (privat, beruflich, in der Ausbildung etc.).</p> <p>... an kulturellen Aktivitäten und Feiern teilzunehmen und in Vereinigungen mitzuwirken.</p> <p>... Zugang zu haben zum kulturellen und historischen Erbe ihrer Gemeinschaft.</p>                                                                                                                                                                                                                                         |
| (8) Die Entwicklung der Gesellschaft mitbestimmen                    | <p>... in Angelegenheiten der Gesellschaft, in der sie leben, mitzuentscheiden.</p> <p>... sich aktiv einzusetzen für Anliegen und Probleme (lokale, nationale, internationale), die ihnen am Herzen liegen.</p> <p>... alleine und zusammen mit Anderen ihre Meinung zu äussern.</p>                                                                                                                                                                                                                                                   |
| (9) Durch die Gesellschaft Schutz erhalten                           | <p>... geschützt zu werden vor öffentlicher und privater Gewalt, vor Eingriffen in die körperliche oder geistig-seelische Integrität und vor Naturgefahren.</p> <p>... ihre Ziele ohne Diskriminierung und mit gleichen Chancen wie Andere zu verfolgen, in Rechtssicherheit zu leben sowie ohne Willkür und mit Respekt behandelt zu werden.</p> <p>... im Fall einer körperlichen oder geistig-seelischen Beeinträchtigung sowie im Falle von Arbeitslosigkeit, Armut und anderen Formen der Bedürftigkeit unterstützt zu werden.</p> |

**Besoins Protégés (French version)** (October 15th, 2016; language revised November 6th, 2018)

| <b>Focus sur la dimension matérielle (Besoins Protégés 1-3)</b>  |                                                                                                                                                                                                                                                                                                                                                                                                                                                                                                                             |
|------------------------------------------------------------------|-----------------------------------------------------------------------------------------------------------------------------------------------------------------------------------------------------------------------------------------------------------------------------------------------------------------------------------------------------------------------------------------------------------------------------------------------------------------------------------------------------------------------------|
| <i>Besoin (ce que les êtres humains doivent pouvoir vouloir)</i> | <i>Description: Les êtres humains doivent avoir la possibilité de ...</i>                                                                                                                                                                                                                                                                                                                                                                                                                                                   |
| (1) Disposer des biens comblant les besoins vitaux               | <p>... se nourrir, en suffisance et de manière variée, avec des aliments qui ne nuisent pas à la santé.</p> <p>... concrétiser leur propre idée d'habiter, dans un logement où ils sont suffisamment protégés et qui est équipé de manière convenable, offrant une sphère privée ainsi que suffisamment d'espace.</p> <p>... prendre soin de leur corps de manière digne et s'habiller convenablement.</p>                                                                                                                  |
| (2) Concrétiser leur propre idée de la vie quotidienne           | <p>... façonner leur quotidien selon leurs propres idées.</p> <p>... se procurer et utiliser des biens comblant les besoins vitaux selon leur priorités parmi une offre variée et de disposer de suffisamment de moyens pour cela.</p> <p>... se mouvoir librement dans l'espace public.</p>                                                                                                                                                                                                                                |
| (3) Vivre dans un environnement agréable à vivre                 | <p>... vivre dans un environnement (construit et naturel) qui ne nuit pas à la santé et est esthétiquement convenable.</p> <p>... établir un rapport sensuel et émotionnel avec la nature.</p> <p>... avoir accès à des paysages naturels et cultivés variés et se mouvoir dans ceux-ci.</p>                                                                                                                                                                                                                                |
| <b>Focus sur les personnes (Besoins Protégés 4-6)</b>            |                                                                                                                                                                                                                                                                                                                                                                                                                                                                                                                             |
| <i>Besoin (ce que les êtres humains doivent pouvoir vouloir)</i> | <i>Description: Les êtres humains doivent avoir la possibilité de ...</i>                                                                                                                                                                                                                                                                                                                                                                                                                                                   |
| (4) Se développer en tant que personne                           | <p>... développer leur potentiel (connaissances, compétences, attitudes, sentiments, etc.) et ainsi leur identité individuelle.</p> <p>... relever les défis de leur choix.</p> <p>... se procurer librement des informations fiables et de se former une opinion.</p>                                                                                                                                                                                                                                                      |
| (5) S'auto déterminer                                            | <p>... décider librement quelles valeurs adopter ou refuser (spiritualité, religiosité, idéologie, etc.) et de les appliquer.</p> <p>... se fixer leurs propres objectifs dans la vie et de les poursuivre.</p> <p>... déterminer eux-mêmes leur manière de vivre (relations intimes, planification familiale, lieu de résidence, etc.).</p>                                                                                                                                                                                |
| (6) Exercer des activités qu'eux-mêmes valorisent                | <p>... exercer des activités qu'ils considèrent eux-mêmes comme épanouissantes (au travail et dans les loisirs; rémunérées ou non-rémunérées).</p> <p>... exercer des activités qui correspondent à leur personnalité, leur permettant d'exploiter leur potentiel (au travail et dans les loisirs; rémunérées ou non-rémunérées).</p> <p>... répartir leur temps entre leurs différentes activités comme ils l'entendent, tout en ayant également du temps pour ne rien faire.</p>                                          |
| <b>Focus sur la communauté (Besoins Protégés 7-9)</b>            |                                                                                                                                                                                                                                                                                                                                                                                                                                                                                                                             |
| <i>Besoin (ce que les êtres humains doivent pouvoir vouloir)</i> | <i>Description: Les êtres humains doivent avoir la possibilité de ...</i>                                                                                                                                                                                                                                                                                                                                                                                                                                                   |
| (7) Faire partie d'une communauté                                | <p>... entretenir des relations sociales avec d'autres personnes (dans le privé, au travail, durant la formation, etc.).</p> <p>... participer à des activités culturelles, ainsi qu'à des fêtes et des cérémonies, et de s'engager dans des associations.</p> <p>... avoir accès à l'héritage culturel et historique de leur communauté.</p>                                                                                                                                                                               |
| (8) Participer aux décisions sur l'évolution de la société       | <p>... participer aux décisions sur les questions concernant la société dans laquelle ils vivent.</p> <p>... s'engager activement pour des préoccupations et des problèmes (locaux, nationaux, internationaux) qui leur tiennent à cœur.</p> <p>... exprimer, seul ou avec d'autres, leur opinion.</p>                                                                                                                                                                                                                      |
| (9) Être protégé par la société                                  | <p>... être protégé contre la violence publique et privée, contre des atteintes à l'intégrité corporelle et mentale-psychique, ainsi que contre des dangers naturels.</p> <p>... poursuivre leurs buts sans être discriminé et selon l'égalité des chances, vivre dans la sécurité juridique ainsi que d'être traité non-arbitrairement et avec respect.</p> <p>... être soutenu en cas d'une diminution physique ou mentale-psychique, ainsi que dans une situation de chômage, pauvreté ou d'autres formes de besoin.</p> |
